# Supplementary material
Source: PubMed Central journal article supplement (PMC4331268)

### Supplemental Figure 1.

Exon sequencing result coverage in the region around Cyp1a1 and 1a2 genes.

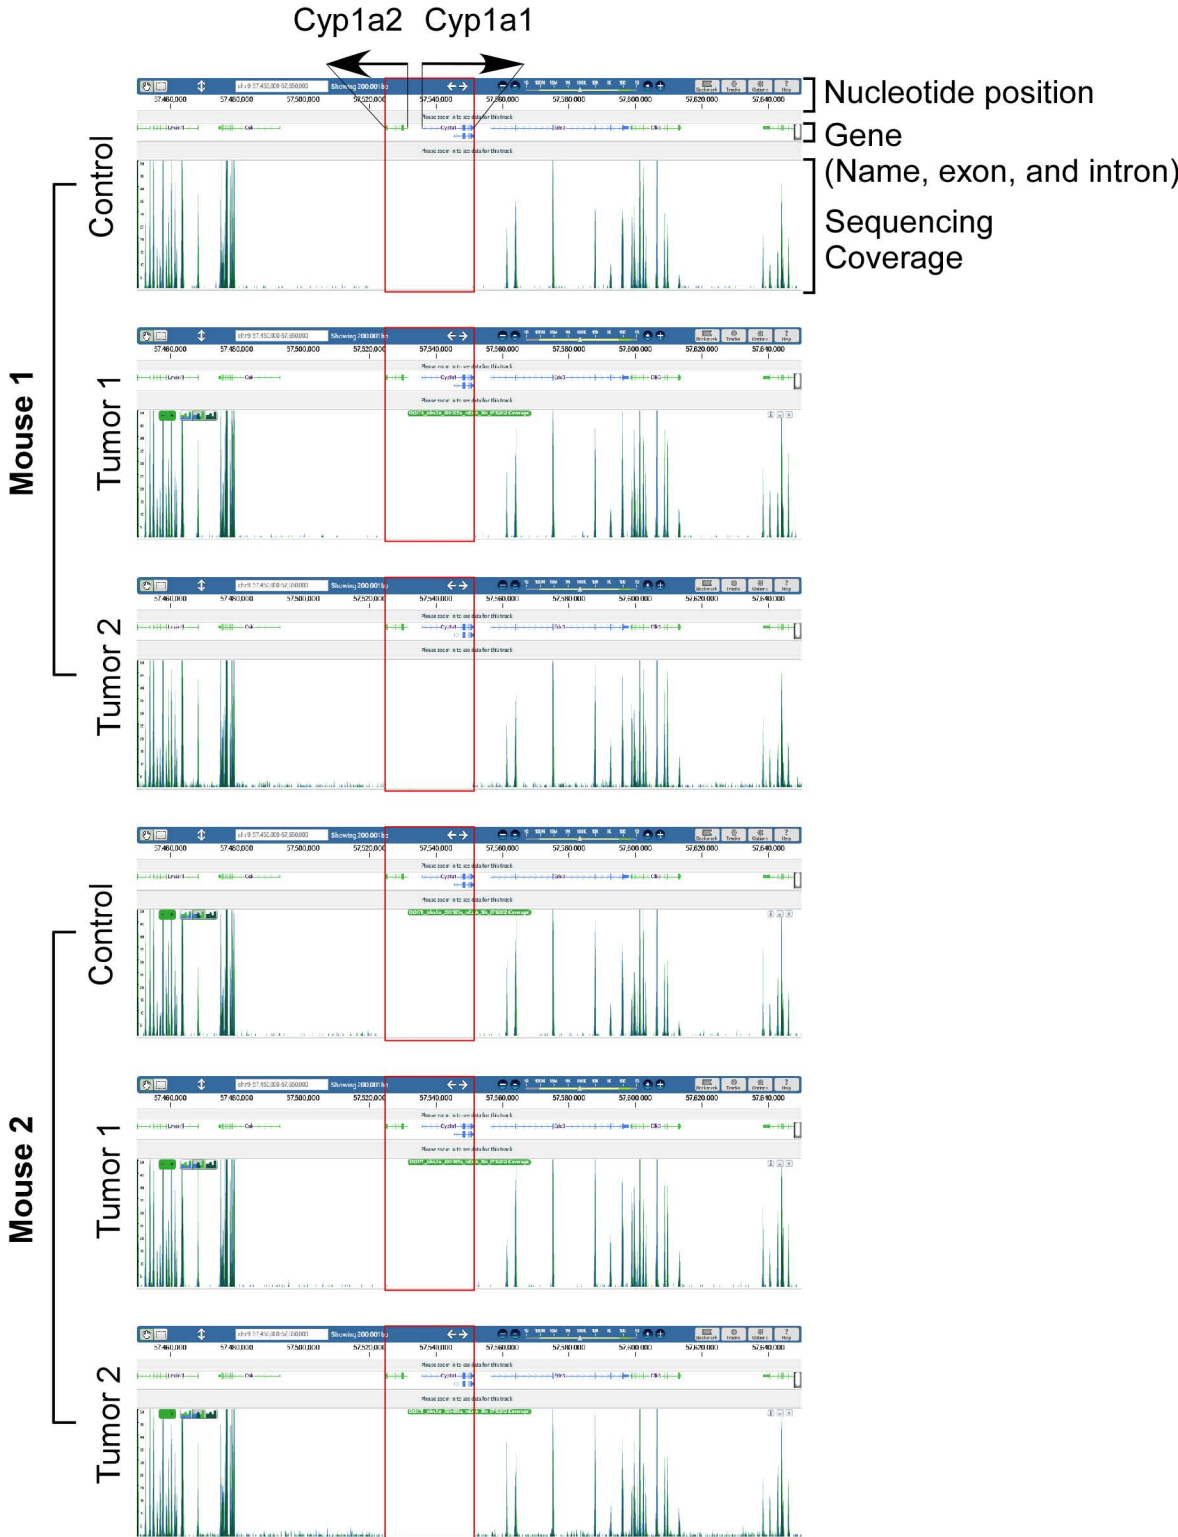

Supplement: NIHMS608813-supplement-Supp_FigureS1-S2.pdf [file NIHMS608813-supplement-Supp_FigureS1-S2.pdf]
